# Supplementary material
Source: PubMed Central journal article supplement (PMC10386889)
Supplement: NIHMS1915972-supplement-1.pdf [file NIHMS1915972-supplement-1.pdf]

446 **Supplementary Material A**

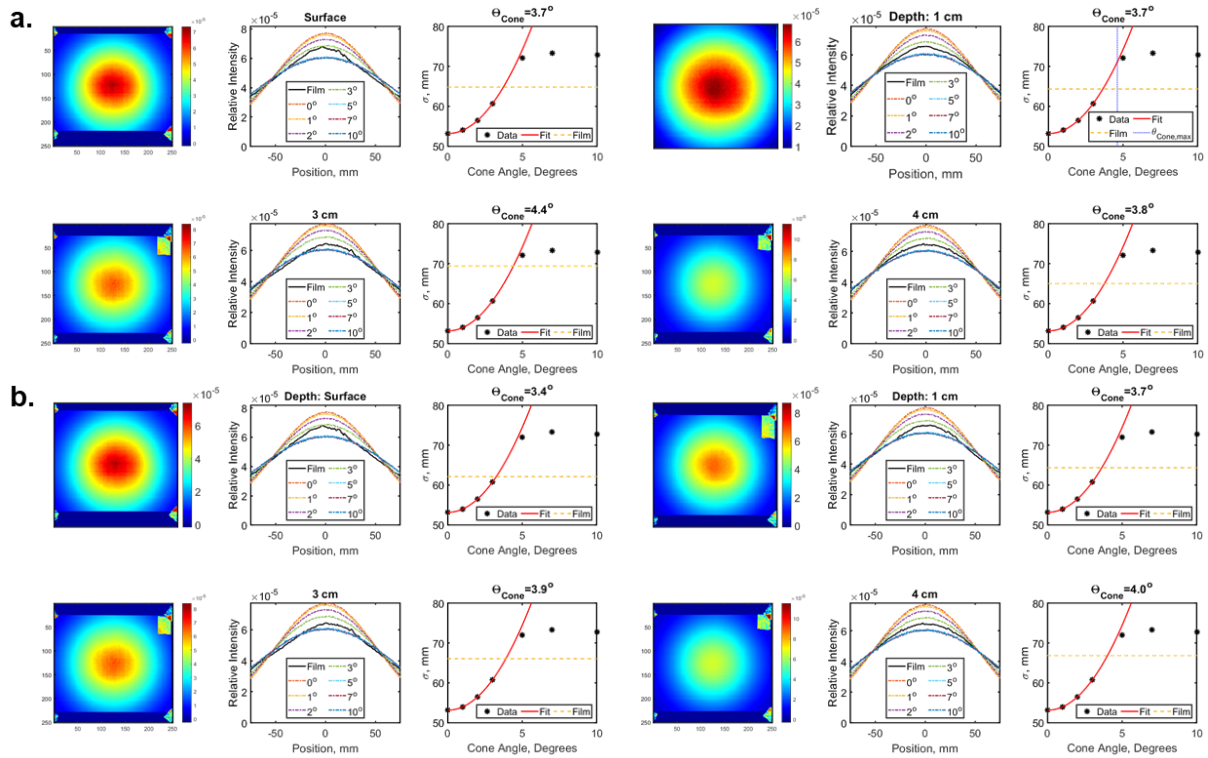

447

448

449 **Supplementary Figures 1A.** Determining the fitted cone angle from all **a.** cross-plane and **b.** in-  
 450 plane profiles at depths of surface, 1 cm, 3cm, and 4 cm.

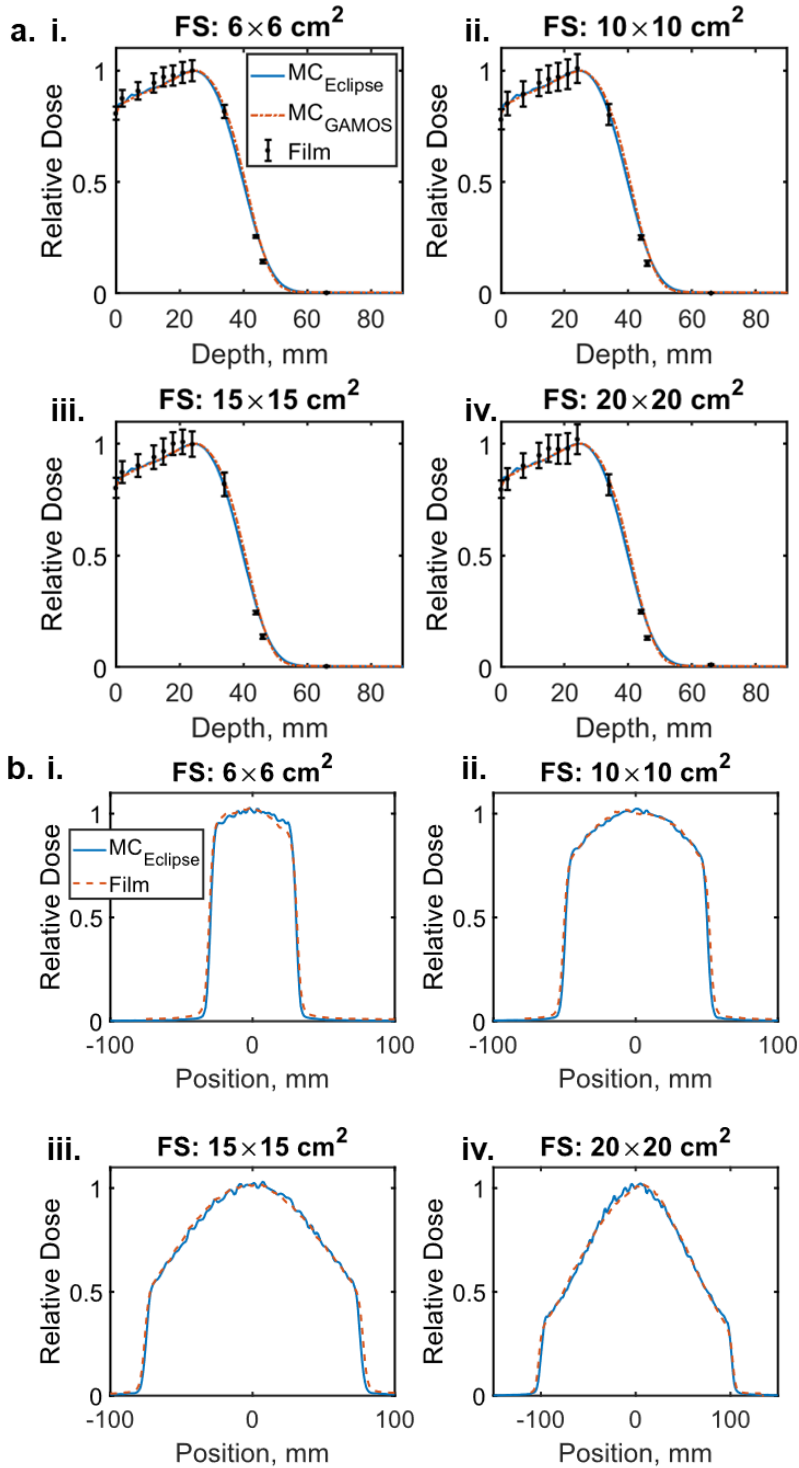

451

452

453 **Supplementary Figures 2A. a.** PDD's from the GAMOS beam model and used for  
 454 configuration of the Eclipse TPS model which includes the electron applicators. **b.** Surface  
 455 lateral profiles for each of the electron applicators from Eclipse TPS model in comparison to  
 456 film.

457

458

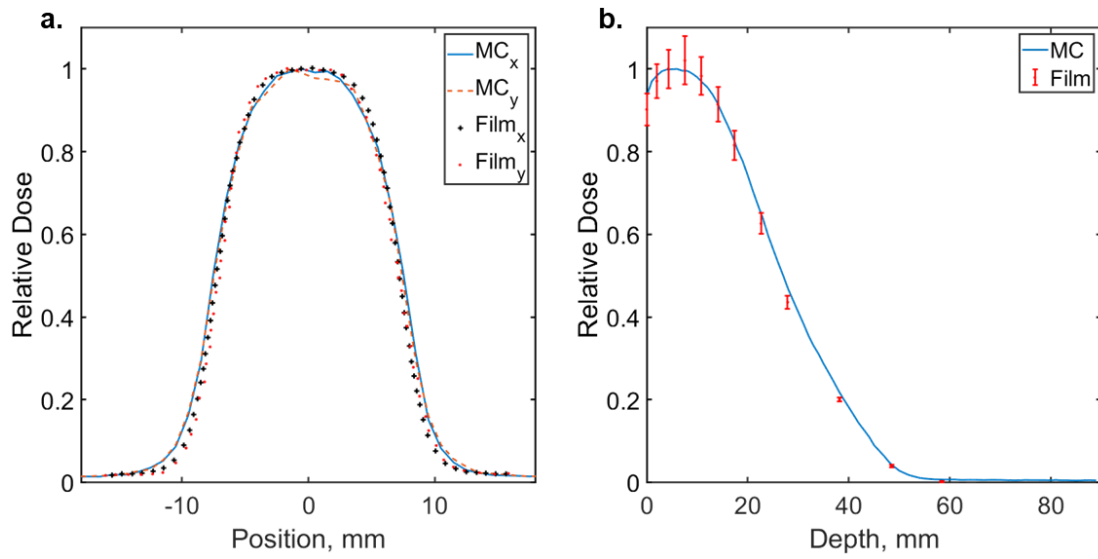

459

460

461

462

**Supplementary Figures 3A. a.** Lateral dose profile at the surface and **b.** percent depth dose curve in water phantom in comparison to film measurements (possible x-ray contamination for greater spread around penumbra and beyond).

463

464

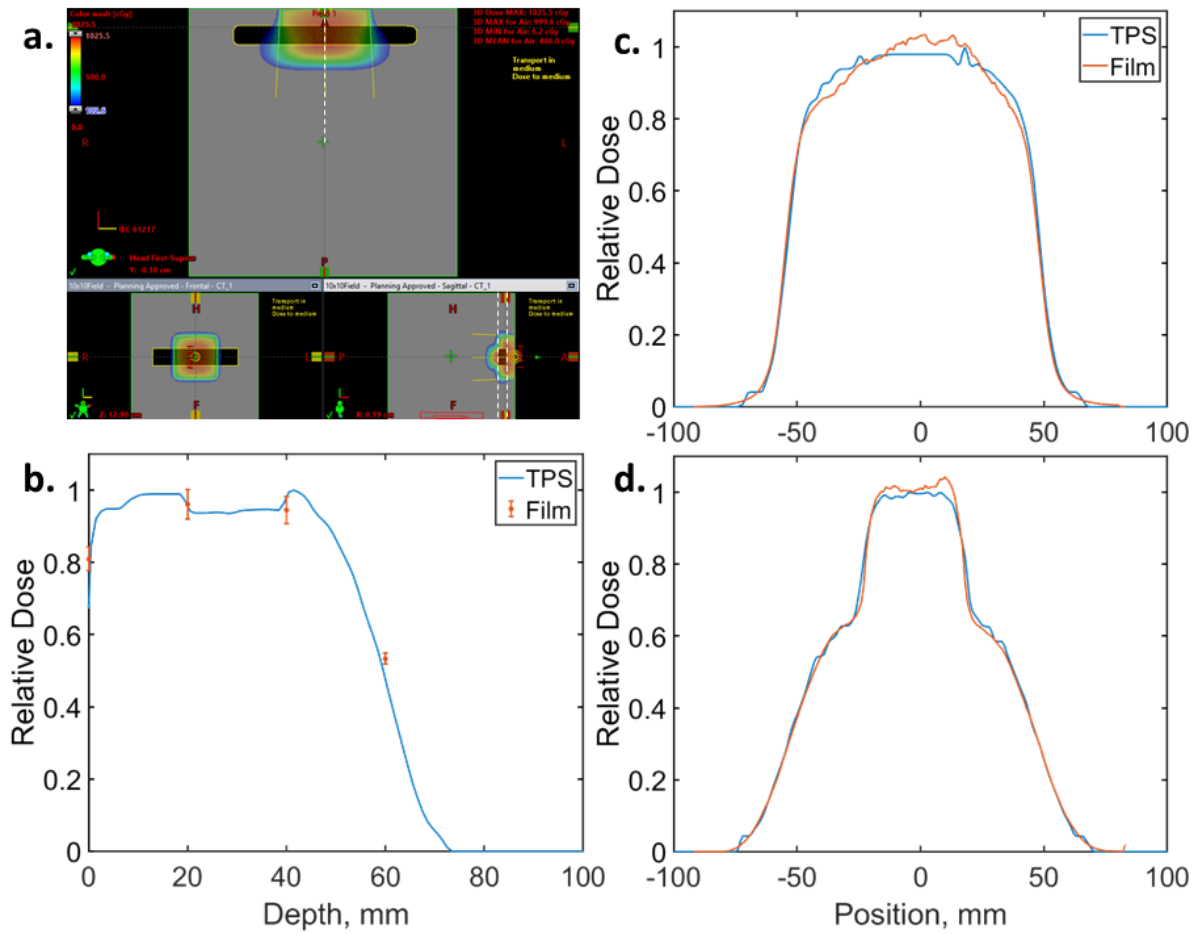

465

466 **Supplementary Figures 4A. a.** Orthogonal views heterogeneous water phantom with a 20x4x2  
 467 cm<sup>3</sup> air volume 2 cm deep from the surface. The white dashed lines are included to show the film  
 468 measured profiles which included **b.** PDD along the central axis **c.** Lateral profile at 2 cm depth  
 469 and **d.** lateral profile at 4 cm depth.

470
